# Supplementary material
Source: Springer Nature journal article supplement (https://www.springermedizin.de/resource/supplementary/12876_2011_717_MOESM5_ESM.pdf/9437666)

**A**

|             |      |         |          |
|-------------|------|---------|----------|
| Total       | n=48 | r=0.55  | p<0.0001 |
| HBV Carrier | n=12 | r=0.25  | p=0.42   |
| CHB         | n=18 | r=-0.06 | p=0.81   |
| ACHBLF      | n=18 | r=0.17  | p=0.48   |

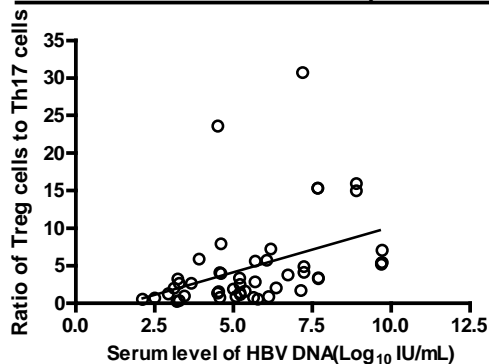**B**

|             |      |         |         |
|-------------|------|---------|---------|
| Total       | n=48 | r=-0.41 | p=0.004 |
| HBV Carrier | n=12 | r=-0.53 | p=0.07  |
| CHB         | n=18 | r=-0.09 | p=0.70  |
| ACHBLF      | n=18 | r=-0.69 | p=0.001 |

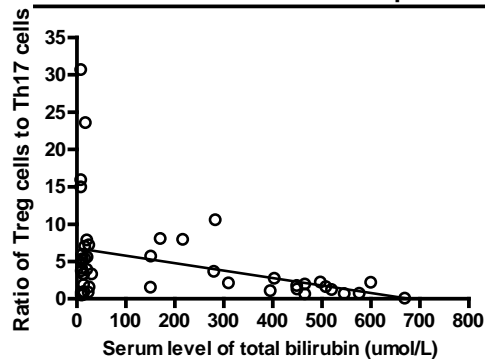**C**

|             |      |         |        |
|-------------|------|---------|--------|
| Total       | n=48 | r=-0.25 | p=0.15 |
| HBV Carrier | n=12 | r=-0.25 | p=0.42 |
| CHB         | n=18 | r=-0.81 | p=0.30 |
| ACHBLF      | n=18 | r=0.11  | p=0.65 |

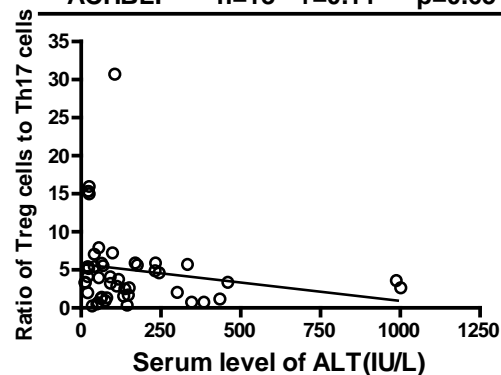**D**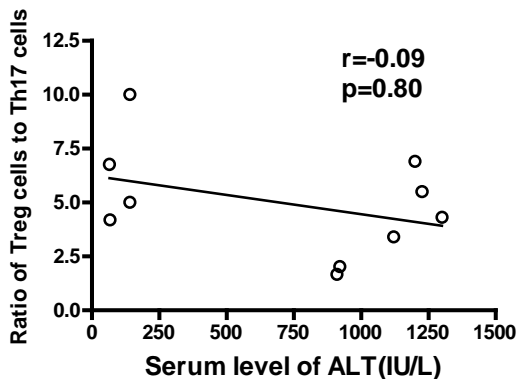**E**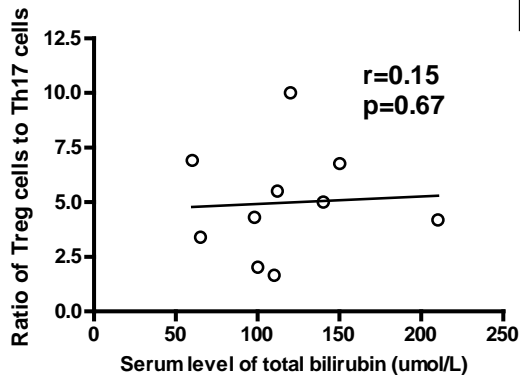**F**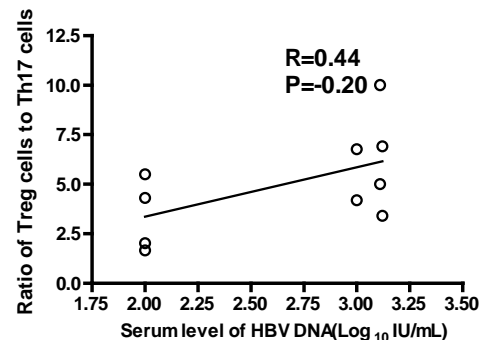

Supplement: MOESM5 [file 9437666]
